# Supplementary material for: Dystrophin R16/17 protein therapy restores sarcolemmal nNOS in trans and improves muscle perfusion and function
Source: PubMed Central journal article supplement (PMC6607532; doi:10.1186/s10020-019-0101-6), 2019-07-02
Supplement: 10020_2019_101_MOESM2_ESM.pdf [file 10020_2019_101_MOESM2_ESM.pdf]

Week 1 2 3 4 5 6 7 8 9 10 11 12 13 14 15

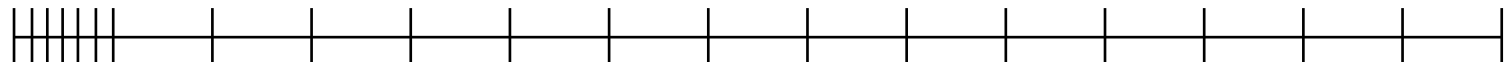

**A**

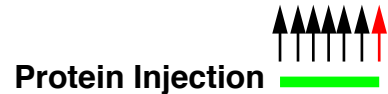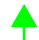

Harvest muscles and compare transduction efficiency of different CPPs (Fig 2)

**B**

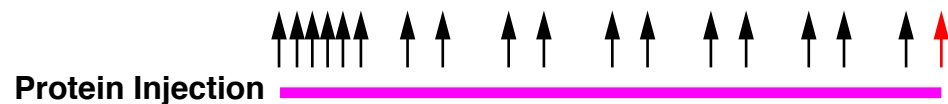

Treadmill

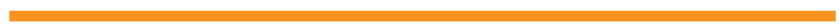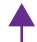

TA muscle function (Fig 5)

**C**

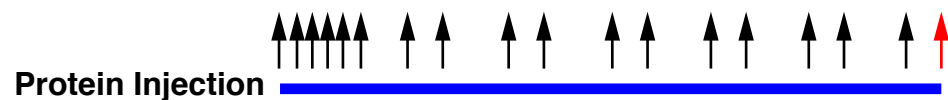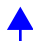

Protein distribution in body-wide muscles, and Blood perfusion (Fig 3, 4 and 6)
