# Supplementary material for: Dystrophin R16/17 protein therapy restores sarcolemmal nNOS in trans and improves muscle perfusion and function
Source: PubMed Central journal article supplement (PMC6607532; doi:10.1186/s10020-019-0101-6), 2019-07-02
Supplement: 10020_2019_101_MOESM4_ESM.pdf [file 10020_2019_101_MOESM4_ESM.pdf]

BL6

4CV

$\Delta R4$

$\Delta R4+mTAT$

CD4

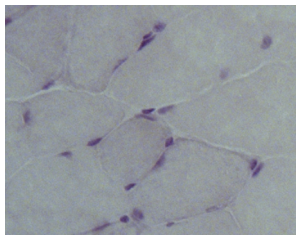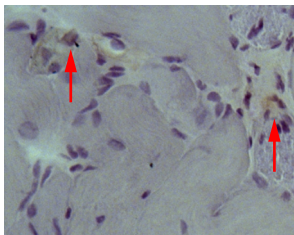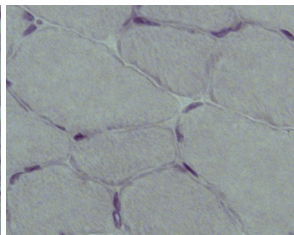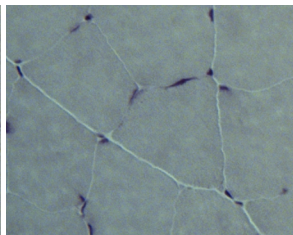

CD8

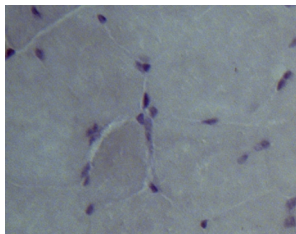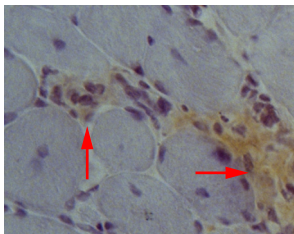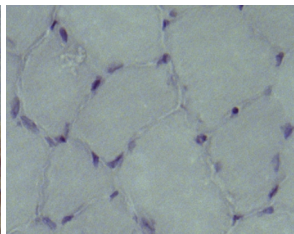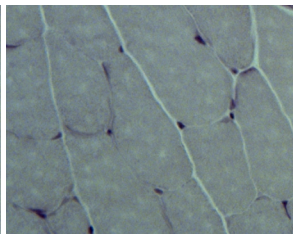

4CV

$\Delta R4+mTAT$

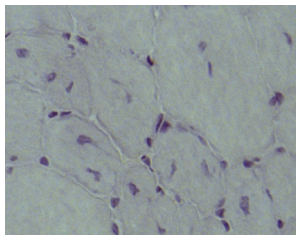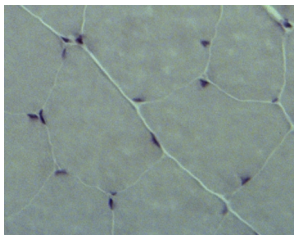

Secondary antibody only
