# Supplementary material for: Dystrophin R16/17 protein therapy restores sarcolemmal nNOS in trans and improves muscle perfusion and function
Source: PubMed Central journal article supplement (PMC6607532; doi:10.1186/s10020-019-0101-6), 2019-07-02

## A $\Delta R4$

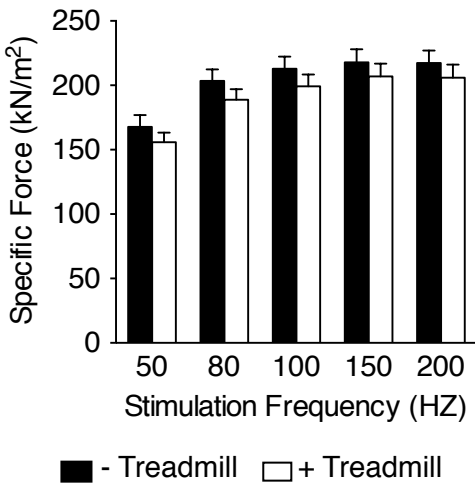

## B $\Delta R4+R16/17$

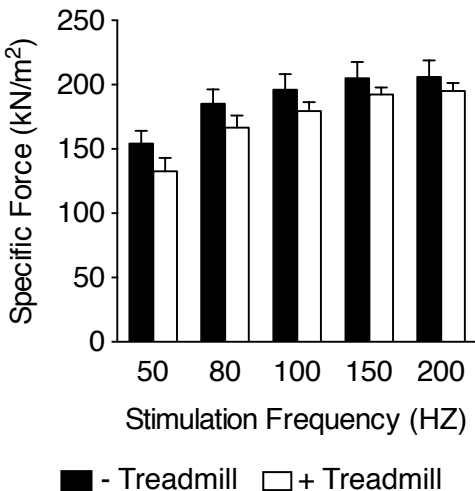

Supplement: 10020_2019_101_MOESM6_ESM.pdf [file 10020_2019_101_MOESM6_ESM.pdf]
